# Supplementary material for: Chemical Profiling and Bioactivity Assessment of Helichrysum italicum (Roth) G. Don. Essential Oil: Exploring Pure Compounds and Synergistic Combinations
Source: MDPI journal article supplement (doi:10.3390/molecules28145299), 2023-07-09
Supplement: s1 [file s1]

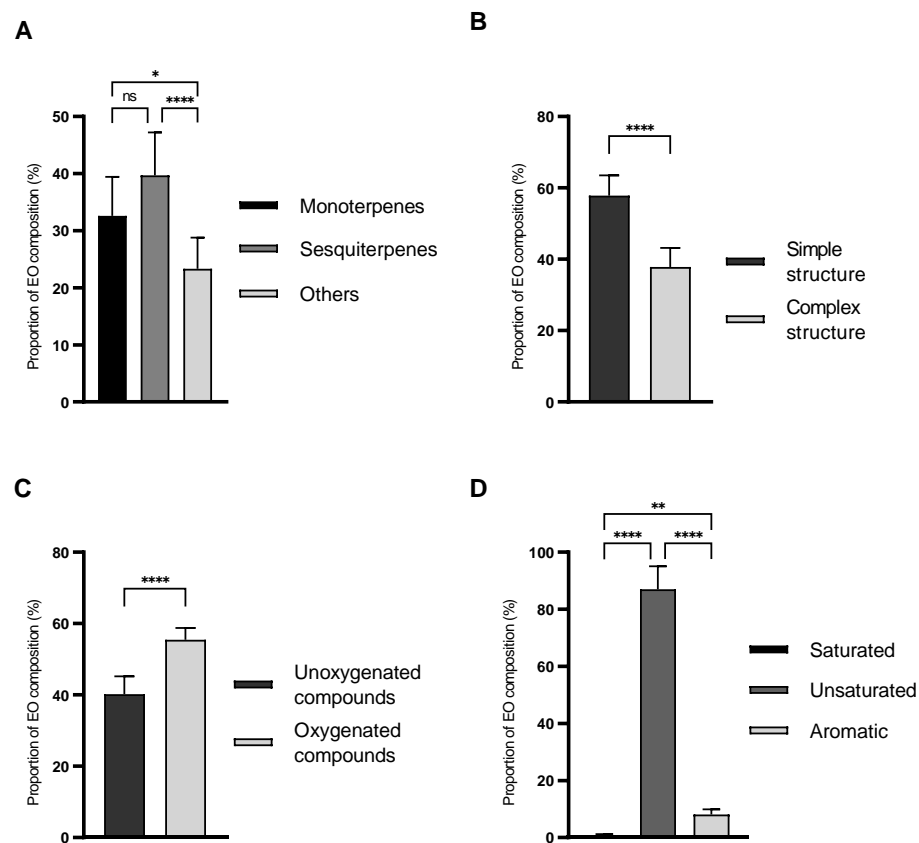

**Figure S1.** Chemical composition of essential oil of *Helichrysum italicum* (Roth) G. Don **(A)** Proportion of monoterpene, sesquiterpene, and other compounds in *H. italicum* EOs. **(B)** Proportion of compounds with simple (non or one carbon ring in the structure) and complex (two or more carbon rings) structure. **(C)** Proportion of unxygenated and oxygenated compounds in the EOs composition. **(D)** Proportion of saturated, unsaturated, and aromatic compounds in the EOs composition. Values were compared by performing a two-way ANOVA test with post hoc Tukey's corrected multiple comparison tests for charts A and D, while a two-tailed unpaired *t*-test was used for charts B and C. Symbols for different test significance levels are assigned as follows: not significant (*ns*) for  $p \geq 0.05$ , \* for  $0.01 \leq p < 0.05$ , \*\* for  $0.001 \leq p < 0.01$ , \*\*\* for  $0.0001 \leq p < 0.001$ , and \*\*\*\* for  $p < 0.0001$ . All data are presented as mean  $\pm$  standard deviation (SD).

**Table S1.** Classification of identified compounds according to different groups. The amount of compounds for each group in EO's is expressed in %. *Ar*-aromatic compounds.

| <b>Terpene Compounds</b>       | <b>LA-P</b> | <b>LA-Z</b> | <b>VI</b> | <b>KS</b> | <b>PL</b> | <b>PT</b> | <b>MA</b> | <b>KO-1</b> | <b>KO-2</b> |
|--------------------------------|-------------|-------------|-----------|-----------|-----------|-----------|-----------|-------------|-------------|
| Monoterpene hydrocarbons       | 16.24       | 16.44       | 9.86      | 6.21      | 11.96     | 18.56     | 10.17     | 11.00       | 6.45        |
| Derivatives of monoterpenes    | 14.11       | 8.89        | 27.05     | 16.54     | 24.34     | 25.63     | 27.06     | 22.14       | 20.88       |
| Sesquiterpene hydrocarbons     | 24.31       | 28.04       | 25.38     | 23.80     | 33.29     | 20.81     | 29.41     | 33.87       | 36.01       |
| Derivatives of sesquiterpenes  | 10.97       | 15.22       | 2.92      | 15.35     | 8.96      | 9.58      | 13.08     | 9.06        | 14.30       |
| Others                         | 33.47       | 26.94       | 28.59     | 18.38     | 21.44     | 23.75     | 16.89     | 21.74       | 18.93       |
| <b>Functional Groups</b>       | <b>LA-P</b> | <b>LA-Z</b> | <b>VI</b> | <b>KS</b> | <b>PL</b> | <b>PT</b> | <b>MA</b> | <b>KO-1</b> | <b>KO-2</b> |
| Alkenes                        | 34.63       | 37.47       | 27.10     | 19.36     |           | 30.16     | 33.04     | 36.79       | 35.39       |
| Alcohols                       | 10.56       | 15.16       | 6.35      | 12.92     | 11.13     | 14.00     | 13.55     | 14.84       | 17.87       |
| Ketone                         | 31.36       | 25.83       | 24.75     | 16.04     | 20.46     | 20.13     | 14.66     | 18.33       | 15.84       |
| Aromatics                      | 5.92        | 7.01        | 8.14      | 12.16     | 7.57      | 9.21      | 6.54      | 8.08        | 7.99        |
| Esters                         | 12.74       | 5.59        | 27.46     | 13.93     | 20.87     | 22.98     | 25.15     | 17.63       | 16.32       |
| Others                         | 3.89        | 4.47        | 0.00      | 5.87      | 2.28      | 1.85      | 3.67      | 2.14        | 3.16        |
| <b>Size (Molecular weight)</b> | <b>LA-P</b> | <b>LA-Z</b> | <b>VI</b> | <b>KS</b> | <b>PL</b> | <b>PT</b> | <b>MA</b> | <b>KO-1</b> | <b>KO-2</b> |
| 136.23                         | 16.24       | 16.44       | 9.86      | 6.21      | 11.96     | 18.56     | 10.17     | 11.00       | 6.45        |
| 150-197                        | 17.97       | 13.44       | 29.70     | 17.22     | 23.57     | 31.10     | 29.99     | 24.27       | 22.37       |
| 202-211                        | 33.48       | 30.79       | 30.77     | 29.91     | 40.69     | 26.11     | 33.21     | 41.19       | 43.57       |
| 220-225                        | 21.87       | 24.08       | 9.08      | 19.58     | 14.06     | 12.42     | 17.79     | 14.62       | 18.98       |
| >225                           | 9.54        | 10.78       | 14.39     | 7.36      | 9.71      | 10.14     | 5.45      | 6.73        | 5.20        |
| <b>Structure</b>               | <b>LA-P</b> | <b>LA-Z</b> | <b>VI</b> | <b>KS</b> | <b>PL</b> | <b>PT</b> | <b>MA</b> | <b>KO-1</b> | <b>KO-2</b> |
| Acyclic                        | 46.09       | 37.88       | 54.63     | 31.86     | 43.96     | 46.95     | 42.60     | 40.94       | 36.29       |
| Cyclic (1)                     | 11.31       | 14.77       | 10.56     | 15.89     | 12.89     | 17.71     | 13.65     | 21.57       | 21.13       |
| Cyclic (2)                     | 36.93       | 36.18       | 26.33     | 25.21     | 36.60     | 28.46     | 35.74     | 28.67       | 32.34       |
| Cyclic (3)                     | 4.77        | 6.70        | 2.28      | 7.32      | 6.54      | 5.21      | 4.62      | 6.63        | 6.81        |
| <b>Number of Oxygen Atoms</b>  | <b>LA-P</b> | <b>LA-Z</b> | <b>VI</b> | <b>KS</b> | <b>PL</b> | <b>PT</b> | <b>MA</b> | <b>KO-1</b> | <b>KO-2</b> |
| n=0                            | 40.55       | 44.48       | 35.24     | 30.01     | 45.25     | 39.37     | 39.58     | 44.87       | 42.46       |

|                                       |             |             |           |           |           |           |           |             |             |
|---------------------------------------|-------------|-------------|-----------|-----------|-----------|-----------|-----------|-------------|-------------|
| n=1                                   | 14.45       | 19.63       | 6.35      | 18.79     | 13.41     | 15.85     | 17.22     | 16.98       | 21.03       |
| n=2                                   | 44.10       | 31.42       | 52.21     | 31.48     | 41.33     | 43.11     | 39.81     | 35.96       | 33.08       |
| <b>Unsaturated Bonds in Molecules</b> | <b>LA-P</b> | <b>LA-Z</b> | <b>VI</b> | <b>KS</b> | <b>PL</b> | <b>PT</b> | <b>MA</b> | <b>KO-1</b> | <b>KO-2</b> |
| n=0                                   | 0.67        | 1.81        | 0.00      | 1.53      | 0.00      | 0.78      | 0.00      | 0.00        | 0.00        |
| n=1                                   | 25.98       | 24.87       | 14.66     | 19.32     | 25.03     | 28.19     | 22.79     | 23.79       | 23.28       |
| n=2                                   | 25.32       | 28.51       | 25.06     | 20.08     | 28.15     | 23.16     | 28.96     | 28.51       | 30.84       |
| n=3                                   | 41.21       | 33.33       | 45.94     | 27.19     | 39.24     | 36.99     | 38.32     | 37.43       | 34.46       |
| Ar                                    | 5.92        | 7.01        | 8.14      | 12.16     | 7.57      | 9.21      | 6.54      | 8.08        | 7.99        |

**Table S2.** The results of statistical correlation analysis for cytotoxic activity and different groups of compounds. *No*-number, *r*-Pearson's correlation coefficients; *p*-value of significance; *ns*-not statistically significant. Only statistically significant results ( $p < 0.05$ ) were presented in the table.

| <b>Terpene compounds vs. IC<sub>50</sub></b> | <b>HDF</b>                    | <b>BEAS-2B</b>                | <b>MDA-MB-213</b>             |
|----------------------------------------------|-------------------------------|-------------------------------|-------------------------------|
| Monoterpene hydrocarbons                     | $r = 0.02734$<br>$p = 0.4722$ | $r = -0.0472$<br>$p = 0.4520$ | $r = -0.0163$<br>$p = 0.4834$ |
| Derivatives of monoterpenes                  | $r = 0.2639$<br>$p = 0.2463$  | $r = 0.5948$<br>$p = 0.0456$  | $r = 0.5515$<br>$p = 0.0619$  |
| Sesquiterpenes                               | $r = 0.4945$<br>$p = 0.0880$  | $r = -0.5753$<br>$p = 0.0525$ | $r = 0.3008$<br>$p = 0.2158$  |
| Derivatives of sesquiterpenes                | $r = -0.4068$<br>$p = 0.1386$ | $r = -0.5008$<br>$p = 0.0848$ | $r = -0.4046$<br>$p = 0.1401$ |
| Other compounds                              | $r = 0.06804$<br>$p = 0.4310$ | $r = -0.1932$<br>$p = 0.3092$ | $r = 0.0235$<br>$p = 0.4761$  |
| <b>Functional groups vs. IC<sub>50</sub></b> | <b>HDF</b>                    | <b>BEAS-2B</b>                | <b>MDA-MB-213</b>             |
| Alkenes                                      | $r = 0.4760$<br>$p = 0.0976$  | $r = -0.7103$<br>$p = 0.0160$ | $r = 0.3677$<br>$p = 0.1651$  |
| Alcohols                                     | $r = 0.1030$<br>$p = 0.3960$  | $r = -0.4751$<br>$p = 0.0981$ | $r = -0.1055$<br>$p = 0.3935$ |
| Ketones                                      | $r = -0.0125$<br>$p = 0.4873$ | $r = -0.2793$<br>$p = 0.2333$ | $r = -0.0537$<br>$p = 0.4454$ |
| Aromatics                                    | $r = -0.2095$<br>$p = 0.2943$ | $r = 0.6173$<br>$p = 0.0383$  | $r = -0.5549$<br>$p = 0.0605$ |
| Esters                                       | $r = 0.1575$<br>$p = 0.3429$  | $r = 0.6547$<br>$p = 0.0278$  | $r = 0.5369$<br>$p = 0.0680$  |
| Other compounds                              | $r = -0.5523$<br>$p = 0.0615$ | $r = -0.3534$<br>$p = 0.1755$ | $r = -0.4858$<br>$p = 0.0925$ |

| Structure vs. IC <sub>50</sub>                | HDF                           | BEAS-2B                                                           | MDA-MB-213                                                        |
|-----------------------------------------------|-------------------------------|-------------------------------------------------------------------|-------------------------------------------------------------------|
| Acylic (n = 0)                                | $r = 0.2294$<br>$p = 0.2764$  | $r = 0.3504$<br>$p = 0.1776$                                      | $r = 0.4752$<br>$p = 0.0981$                                      |
| Cyclic (n = 1)                                | $r = 0.5045$<br>$p = 0.0830$  | $r = -0.1634$<br>$p = 0.3372$                                     | $r = 0.0592$<br>$p = 0.4398$                                      |
| Cyclic (n = 2)                                | $r = -0.1277$<br>$p = 0.3717$ | <b><math>r = -0.7733</math></b><br><b><math>p = 0.0073</math></b> | $r = 0.1376$<br>$p = 0.3621$                                      |
| Cyclic (n = 3)                                | $r = 0.0251$<br>$p = 0.4744$  | $r = -0.3848$<br>$p = 0.1532$                                     | $r = -0.4601$<br>$p = 0.1064$                                     |
| Size (molecular weight) vs. IC <sub>50</sub>  | HDF                           | BEAS-2B                                                           | MDA-MB-213                                                        |
| 136.23                                        | $r = 0.0273$<br>$p = 0.4722$  | $r = -0.0472$<br>$p = 0.4520$                                     | $r = -0.0163$<br>$p = 0.4834$                                     |
| 150-197                                       | $r = 0.2445$<br>$p = 0.2630$  | <b><math>r = 0.6151</math></b><br><b><math>p = 0.0390</math></b>  | <b><math>r = 0.5845</math></b><br><b><math>p = 0.0492</math></b>  |
| 202-211                                       | $r = 0.5658$<br>$p = 0.0561$  | <b><math>r = -0.5953</math></b><br><b><math>p = 0.0454</math></b> | $r = 0.3569$<br>$p = 0.1729$                                      |
| 220-225                                       | $r = -0.3691$<br>$p = 0.1642$ | <b><math>r = -0.7598</math></b><br><b><math>p = 0.0088</math></b> | $r = -0.3337$<br>$p = 0.1901$                                     |
| >225                                          | $r = -0.0756$<br>$p = 0.4234$ | $r = 0.3670$<br>$p = 0.1657$                                      | $r = -0.2348$<br>$p = 0.2716$                                     |
| No. of oxygen atoms vs. IC <sub>50</sub>      | HDF                           | BEAS-2B                                                           | MDA-MB-213                                                        |
| n = 0                                         | $r = 0.5391$<br>$p = 0.0671$  | <b><math>r = -0.6407</math></b><br><b><math>p = 0.0315</math></b> | $r = 0.2991$<br>$p = 0.2171$                                      |
| n = 1                                         | $r = -0.1113$<br>$p = 0.3878$ | $r = -0.5084$<br>$p = 0.0811$                                     | $r = -0.2563$<br>$p = 0.2528$                                     |
| n = 2                                         | $r = 0.1156$<br>$p = 0.3836$  | $r = 0.4325$<br>$p = 0.1225$                                      | $r = 0.4473$<br>$p = 0.1137$                                      |
| No. of unsaturated bonds vs. IC <sub>50</sub> | HDF                           | BEAS-2B                                                           | MDA-MB-213                                                        |
| n = 0                                         | $r = -0.5503$<br>$p = 0.0623$ | $r = -0.0114$<br>$p = 0.4883$                                     | <b><math>r = -0.7974</math></b><br><b><math>p = 0.0050</math></b> |
| n = 1                                         | $r = 0.1279$<br>$p = 0.3715$  | $r = -0.4573$<br>$p = 0.1080$                                     | $r = 0.0192$<br>$p = 0.4804$                                      |
| n = 2                                         | $r = 0.3978$<br>$p = 0.1445$  | <b><math>r = -0.6772</math></b><br><b><math>p = 0.0225</math></b> | $r = 0.4341$<br>$p = 0.1215$                                      |
| n = 3                                         | $r = 0.3544$<br>$p = 0.1747$  | $r = 0.0724$<br>$p = 0.4266$                                      | <b><math>r = 0.6433</math></b><br><b><math>p = 0.0308</math></b>  |

**Table S3.** The results of statistical correlation analysis for cytotoxic activity and compounds identified in *H. italicum* EOs. No-number, *r*-Pearson's correlation coefficients; *p*-value of significance; *ns*-not statistically significant. Only statistically significant results (*p* < 0.05) were presented in the table.

| Compound                              | HF77FA        |               | BEAS-2B        |               | MDA-MB-231     |               |
|---------------------------------------|---------------|---------------|----------------|---------------|----------------|---------------|
|                                       | <i>r</i>      | <i>p</i>      | <i>r</i>       | <i>p</i>      | <i>r</i>       | <i>p</i>      |
| $\alpha$ -Pinene                      | -0.0019       | 0.4981        | -0.0277        | 0.4718        | 0.0313         | 0.4681        |
| $\alpha$ -Fenchene                    | -0.0220       | 0.4776        | 0.5364         | 0.0683        | -0.0966        | 0.4023        |
| Limonene                              | 0.0862        | 0.4127        | -0.1185        | 0.3807        | -0.1089        | 0.3901        |
| 1,8-Cineole                           | -0.0587       | 0.4404        | 0.1328         | 0.3667        | 0.0765         | 0.4225        |
| Isobutyl angelate                     | -0.0246       | 0.4749        | 0.3452         | 0.1815        | 0.1570         | 0.3433        |
| Linalool                              | 0.3033        | 0.2326        | 0.4650         | 0.1228        | 0.0300         | 0.4719        |
| 2-Methylbutyl angelate                | <b>0.6569</b> | <b>0.0273</b> | 0.3315         | 0.1918        | <b>0.6606</b>  | <b>0.0264</b> |
| <i>endo</i> -Borneol                  | -0.2328       | 0.2733        | -0.3769        | 0.1587        | -0.5074        | 0.0816        |
| Terpinen-4-ol                         | <b>0.8019</b> | <b>0.0047</b> | -0.3712        | 0.1627        | 0.4137         | 0.1342        |
| 4,6-Dimethyloctane-3,5-dione          | -0.1807       | 0.3209        | 0.2385         | 0.2683        | -0.4268        | 0.1260        |
| $\alpha$ -Terpineol                   | -0.0415       | 0.4578        | <b>-0.6237</b> | <b>0.0363</b> | -0.4686        | 0.1016        |
| Nerol                                 | <b>0.7088</b> | <b>0.0163</b> | 0.0186         | 0.4811        | 0.5025         | 0.0840        |
| Neryl acetate                         | -0.0461       | 0.4532        | <b>0.6496</b>  | <b>0.0292</b> | 0.4968         | 0.0868        |
| $\alpha$ -Copaene                     | 0.0832        | 0.4157        | <b>-0.6936</b> | <b>0.0191</b> | -0.2763        | 0.2359        |
| Italicene                             | 0.2791        | 0.2335        | -0.2855        | 0.2282        | -0.2871        | 0.2269        |
| <i>cis</i> - $\alpha$ -Bergamotene    | 0.0862        | 0.4127        | -0.2894        | 0.2251        | -0.1057        | 0.3934        |
| <i>trans</i> - $\beta$ -Caryophyllene | 0.2872        | 0.2268        | -0.2874        | 0.2267        | 0.5094         | 0.0807        |
| <i>trans</i> - $\alpha$ -Bergamotene  | -0.1963       | 0.3063        | -0.0640        | 0.4351        | -0.4373        | 0.1196        |
| Italidione I                          | 0.1765        | 0.3249        | -0.4985        | 0.0860        | 0.2558         | 0.2532        |
| Neryl propanoate                      | 0.5067        | 0.0820        | 0.3541         | 0.1749        | 0.2450         | 0.2626        |
| $\gamma$ -Selinene                    | -0.3331       | 0.1905        | -0.0597        | 0.4394        | <b>-0.7128</b> | <b>0.0156</b> |
| $\gamma$ -Curcumene                   | <b>0.6702</b> | <b>0.0241</b> | -0.3537        | 0.1752        | 0.5128         | 0.0790        |
| <i>Ar</i> -curcumene                  | -0.1175       | 0.3817        | <b>0.7437</b>  | <b>0.0108</b> | -0.4981        | 0.2481        |
| $\beta$ -Selinene                     | 0.2077        | 0.2959        | -0.4268        | 0.1260        | <b>0.6186</b>  | <b>0.0379</b> |
| Italidione II                         | -0.0301       | 0.4693        | <b>-0.6532</b> | <b>0.0282</b> | 0.0373         | 0.4621        |
| $\alpha$ -Selinene                    | 0.0323        | 0.4671        | -0.3125        | 0.2065        | 0.1250         | 0.3743        |
| $\delta$ -Cadinene                    | 0.2621        | 0.2479        | <b>-0.8730</b> | <b>0.0011</b> | 0.3449         | 0.1817        |
| 2-Phenylethyl tiglate                 | -0.3797       | 0.1567        | 0.0872         | 0.4118        | -0.5206        | 0.0754        |
| Nerolidol                             | -0.2435       | 0.2639        | -0.4454        | 0.1148        | -0.4776        | 0.0968        |
| Italidione III                        | -0.0916       | 0.4073        | 0.3591         | 0.1713        | -0.2380        | 0.2688        |
| Viridiflorol                          | -0.4625       | 0.1050        | 0.3463         | 0.1807        | -0.5706        | 0.0543        |
| Guaiol                                | 0.0285        | 0.4709        | 0.1784         | 0.3231        | -0.0854        | 0.4135        |
| Humulene epoxide II                   | -0.5242       | 0.0737        | -0.3665        | 0.1660        | -0.4844        | 0.0932        |
| Rosifoliol                            | 0.3338        | 0.1900        | 0.0915         | 0.4074        | <b>0.6751</b>  | <b>0.0230</b> |

|                    |         |        |         |        |         |        |
|--------------------|---------|--------|---------|--------|---------|--------|
| $\gamma$ -Eudesmol | -0.0070 | 0.4929 | -0.1127 | 0.3864 | 0.0363  | 0.4630 |
| $\tau$ -Cadinol    | -0.2867 | 0.2273 | -0.5653 | 0.0564 | -0.4234 | 0.1281 |
| $\beta$ -Eudesmol  | -0.3153 | 0.2043 | 0.1661  | 0.3347 | -0.4439 | 0.1157 |
| $\alpha$ -Muurolol | -0.2511 | 0.2573 | -0.3947 | 0.1466 | -0.1569 | 0.3434 |
| $\beta$ -Bisabolol | -0.0085 | 0.4914 | -0.3533 | 0.1755 | -0.1055 | 0.3935 |
| Neryl hexanoate    | 0.0684  | 0.4306 | 0.1715  | 0.3295 | -0.0614 | 0.4377 |

---
